# Supplementary material
Source: PubMed Central journal article supplement (PMC7603899)
Supplement: NIHMS1629962-supplement-1.pdf [file NIHMS1629962-supplement-1.pdf]

Supplemental Material for

## **The third coiled coil domain of Atg11 is required for shaping mitophagy initiation sites**

Authors: Hannah K. Margolis<sup>1\*</sup>, Sarah Katzenell<sup>1\*</sup>, Kelsie A. Leary<sup>1</sup>, Michael J. Ragusa<sup>1,2</sup>

<sup>1</sup>Department of Chemistry, Dartmouth College, Hanover, NH 03755

<sup>2</sup>Department of Biochemistry and Cell Biology, Geisel School of Medicine, Dartmouth College, Hanover, New Hampshire 03755.

\*Equal Contribution

Correspondence to Michael J. Ragusa: [michael.j.ragusa@dartmouth.edu](mailto:michael.j.ragusa@dartmouth.edu)

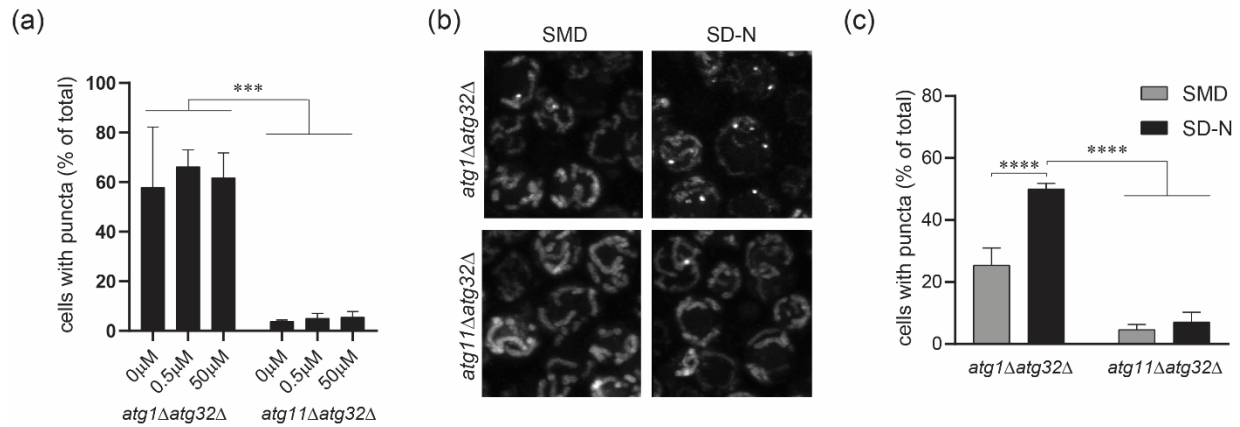

**Figure S1.** The formation of Atg32 puncta is independent of Atg32 concentration and fluorophore. (a) Quantification of puncta prevalence observed in *atg1Δatg32Δ* or *atg11Δatg32Δ* cells expressing GFP-Atg32 driven by the CUP1 promoter, induced with the indicated copper concentrations and incubated in SD-N for 1 hr. (b) Representative images showing mCherry-Atg32 driven by the CUP1 promoter with 0.5 μM copper in *atg1Δatg32Δ* or *atg11Δatg32Δ* cells. Cells were grown in SMD, then transferred to SD-N for 1 hr. (c) Quantification of the percent of cells containing puncta from b.

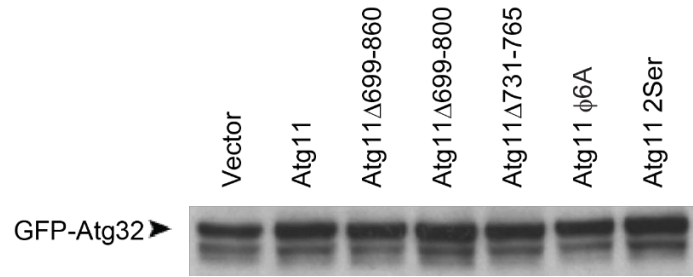

**Figure S2.** Expression of GFP-Atg32 when co-expressed with different Atg11 variants. GFP-Atg32 was co-expressed with Atg11 variants in *atg11 $\Delta$ atg32 $\Delta$*  cells grown in SMD. Samples were blotted against GFP.

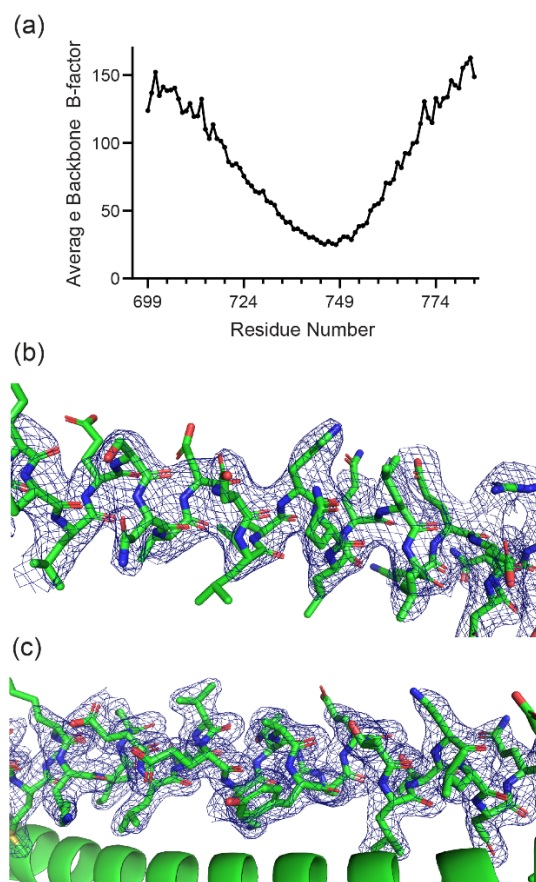

**Figure S3.** B-factors and electron density for Atg11<sub>699-800</sub>. (a) Average B-factor values for backbone atoms determined by BAVEGAGE in CCP4 and plotted per residue. (b) 2Fo-Fc map contoured at 1.0  $\sigma$  for residues 704-726. (c) 2Fo-Fc map contoured at 2.0  $\sigma$  for residues 734-757.

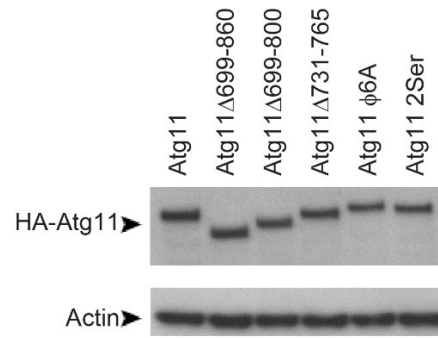

**Figure S4.** Expression of different Atg11 variants. HA-Atg11 variants were expressed in *atg11Δatg32Δ* cells grown in SMD. Samples were blotted against HA.
